# Supplementary material for: Staufen1 impairs stress granule formation in skeletal muscle cells from myotonic dystrophy type 1 patients
Source: PubMed Central journal article supplement — Mol Biol Cell. 2016 Jun 1;27(11):1728–39. doi: 10.1091/mbc.E15-06-0356 (PMC4884064; doi:10.1091/mbc.e15-06-0356), 2016-06-01
Supplement: supp_E15-06-0356v1_CombinedSupMats.pdf [file supp_E15-06-0356v1_CombinedSupMats.pdf]

# Supplemental Materials

*Molecular Biology of the Cell*

Ravel-Chapuis et al.

# **Staufen1 Impairs Stress Granule Formation in Skeletal Muscle Cells from Myotonic Dystrophy type 1 Patients**

Aymeric Ravel-Chapuis, Amanda Klein Gunnewiek, Guy Bélanger, Tara E. Crawford Parks, Jocelyn Côté, and Bernard J. Jasmin

**Supplemental Material**

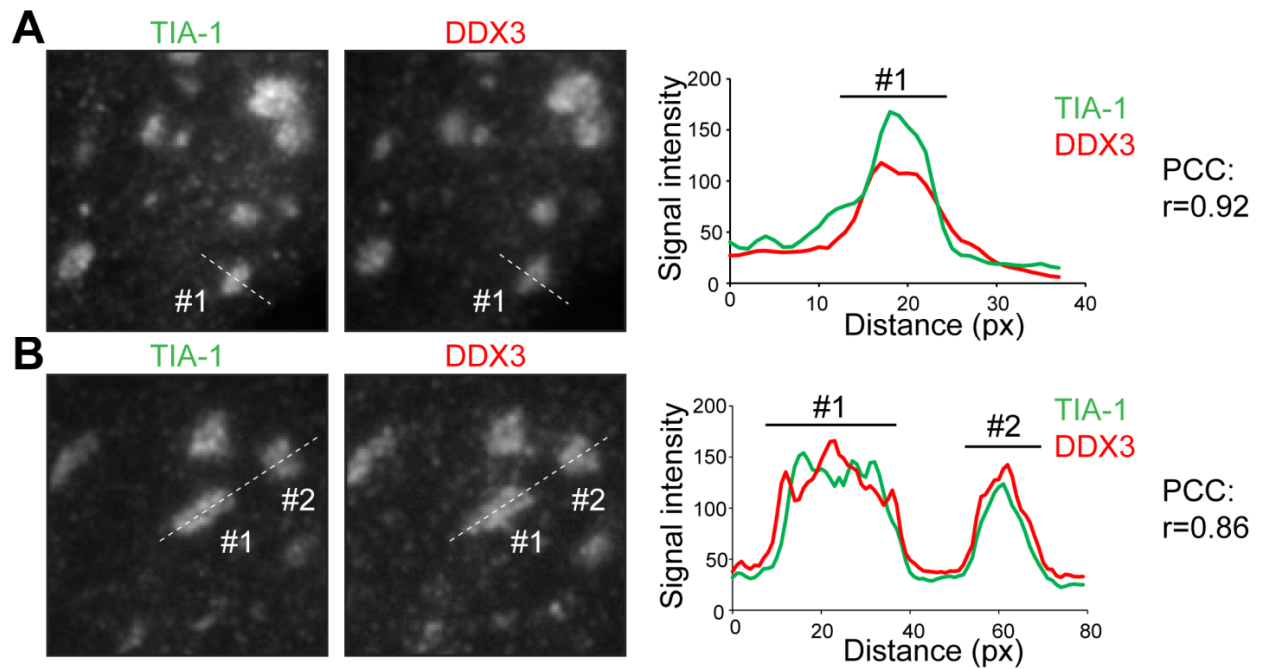

**Figure S1: TIA-1 and DDX3 perfectly colocalize in C2C12 myoblasts and human primary fibroblasts.** (A-B) Magnification of arsenite-treated mouse C2C12 from Figure 1A (A) and arsenite-treated human fibroblasts from Figure 5A.(B) Signal intensity histograms along a line segment crossing SGs showing a perfect overlap of TIA-1 and DDX3 immunostainings. Pearson's Correlation Coefficient (PCC) were measured on these magnifications.

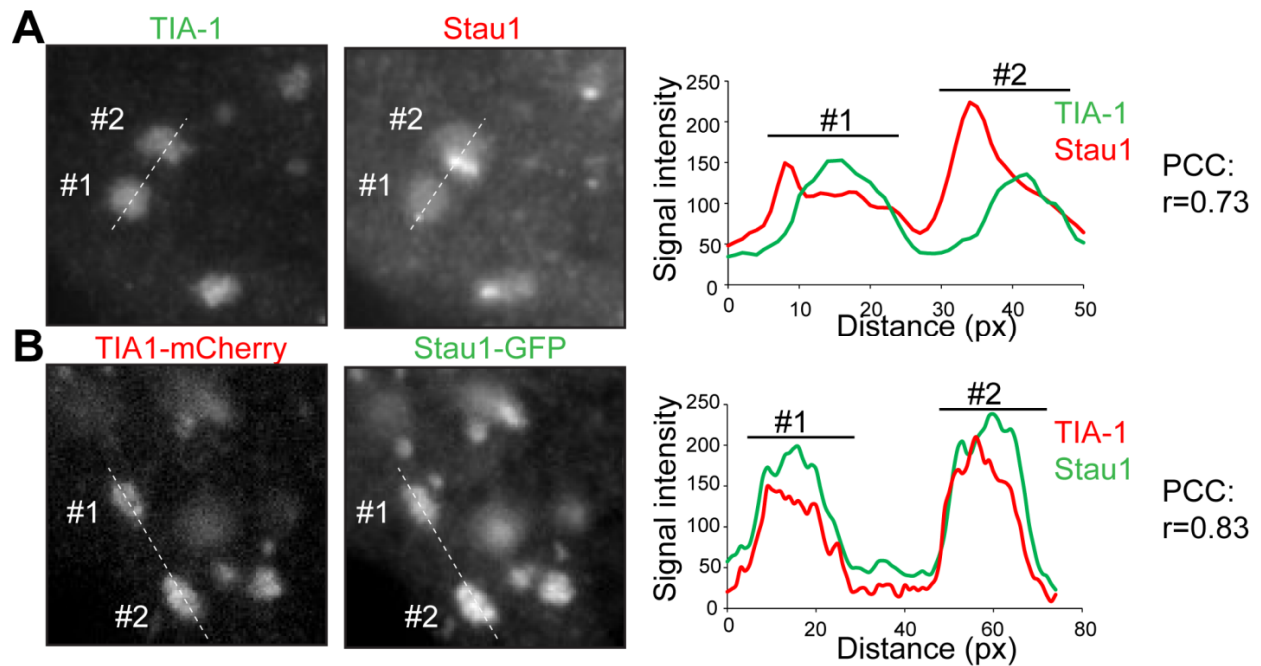

**Figure S2: TIA-1 and Staufen1 colocalize in C2C12 myoblasts.** (A-B) Magnification of arsenite-treated mouse C2C12 from Figure 2A (A) and arsenite-treated transfected C2C12 from Figure 3A. (B) Signal intensity histograms along a line segment crossing SGs showing overlap of TIA-1 and Staufen1. Pearson's Correlation Coefficient (PCC) were measured on these magnifications.

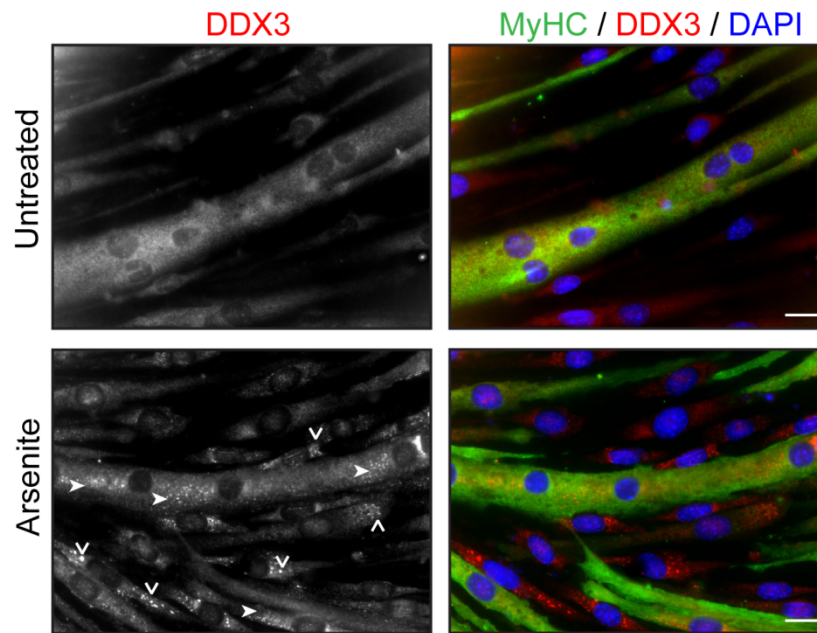

**Figure S3: Arsenite induces formation of SGs in Myotubes.** Three-day differentiated myotubes were untreated or treated with 0.5 mM arsenite for 45 min. Co-immunofluorescence staining was performed using DDX3 antibodies to visualize SGs and pan-MyHC antibodies to delineate differentiated myotubes. DAPI was used to stain nuclei. Plain and open arrowheads show SGs in myotubes and quiescent cells, respectively. Scale bars, 20  $\mu$ m.

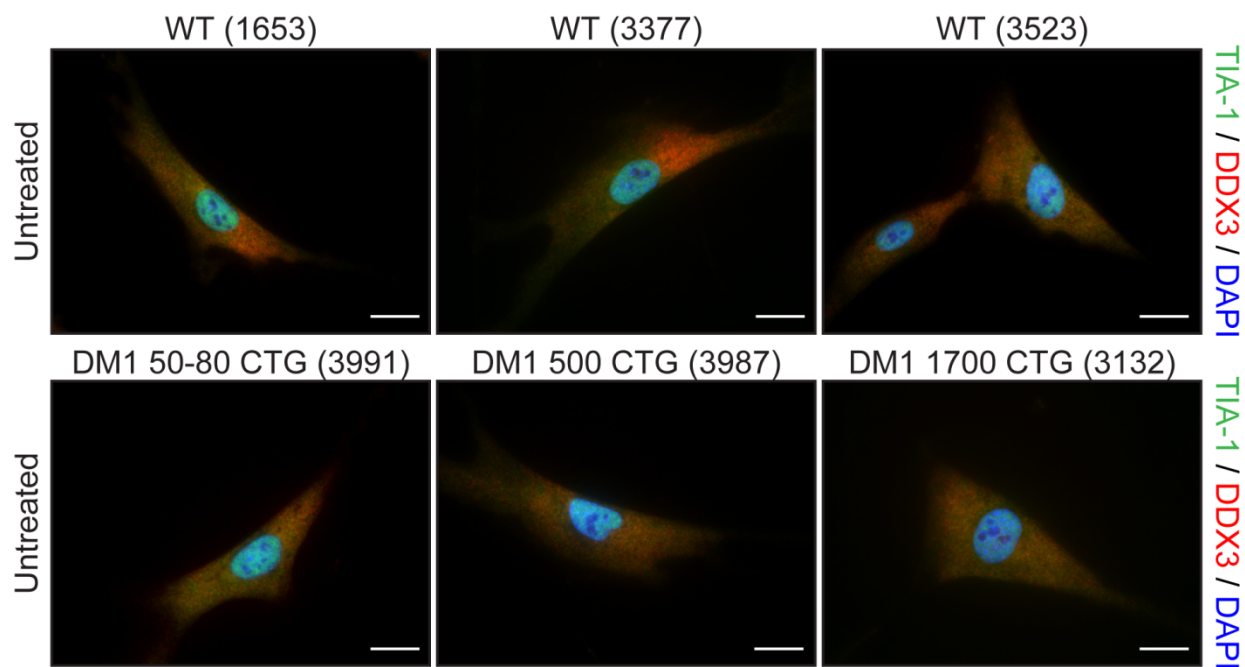

**Figure S4: DM1 fibroblasts do not form spontaneous DDX3 or TIA1 cytoplasmic aggregates.** Proliferative untreated wildtype (WT) and DM1 fibroblasts were stained with TIA-1 and DDX3 antibodies. DAPI was used to stain nuclei. Scale bars, 20  $\mu$ m.

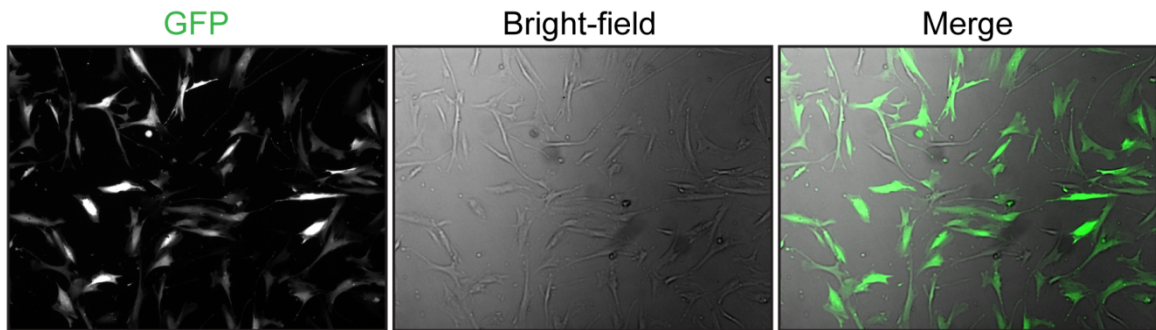

**Figure S5: Control infection of human primary fibroblasts by a GFP-lentivirus.** Proliferative fibroblasts were infected with a GFP-lentivirus. Representative microscopy image showing 100% infection of human fibroblasts by the GFP-lentivirus.

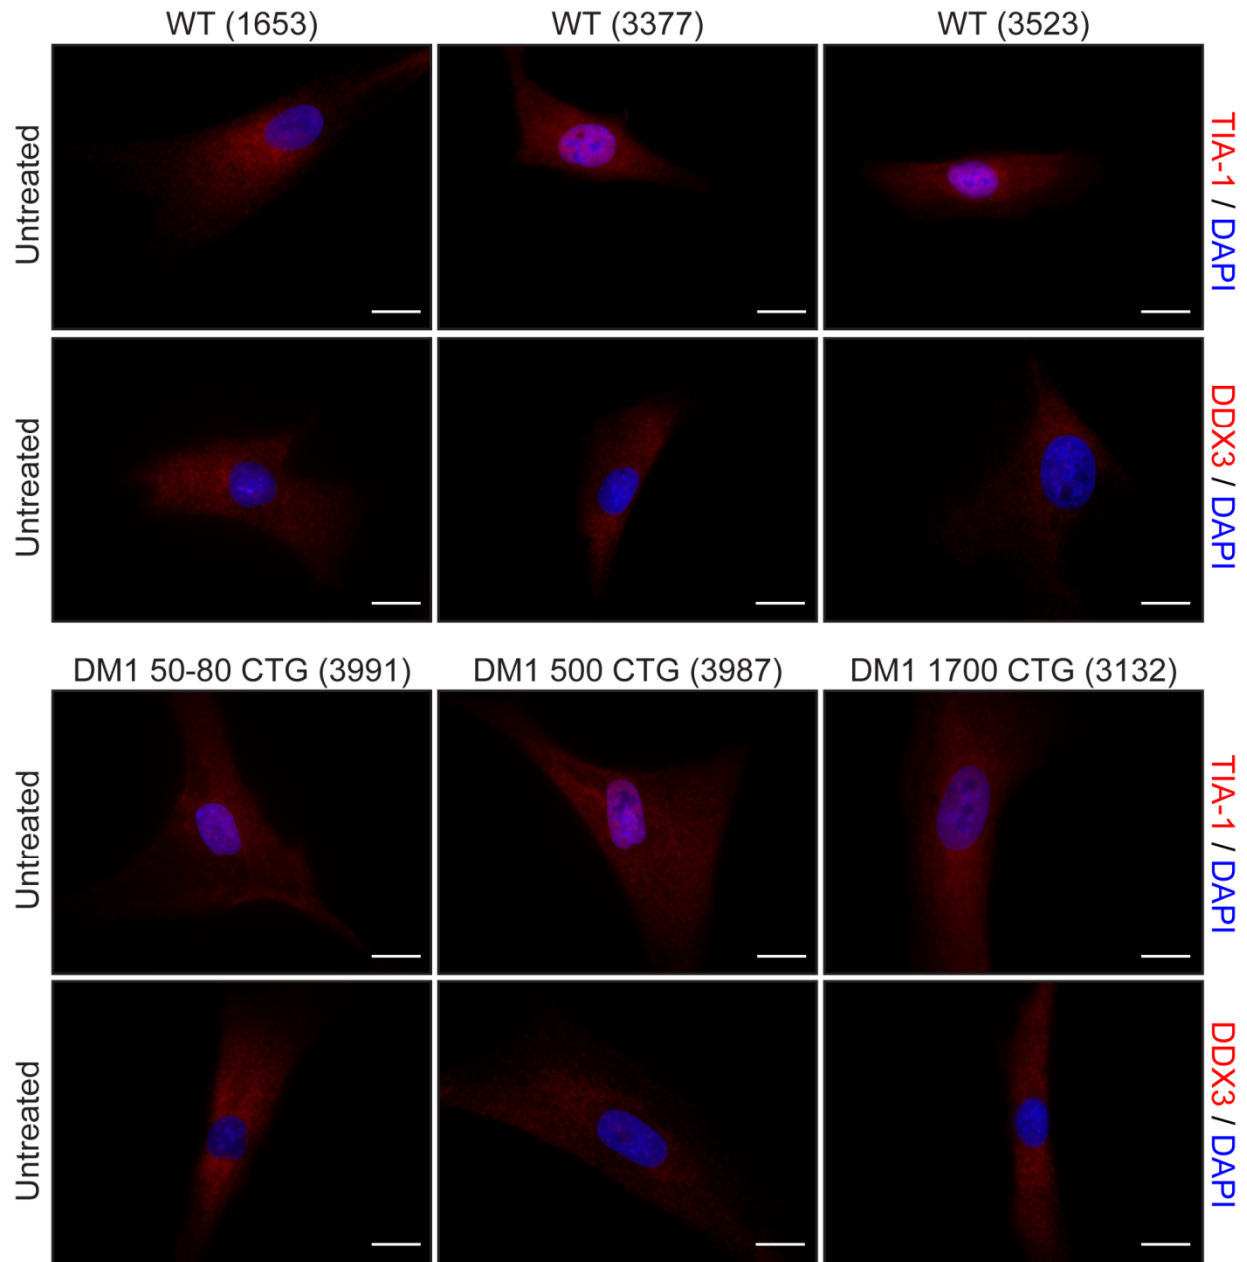

**Figure S6: DM1 myoblasts do not form spontaneous DDX3 or TIA1 aggregates.** WT and DM1 fibroblasts were converted into myoblasts by MyoD lentivirus infection. Immunofluorescence were performed using TIA-1 or DDX3 antibodies. DAPI was used to stain nuclei. Scale bar, 20  $\mu$ m.



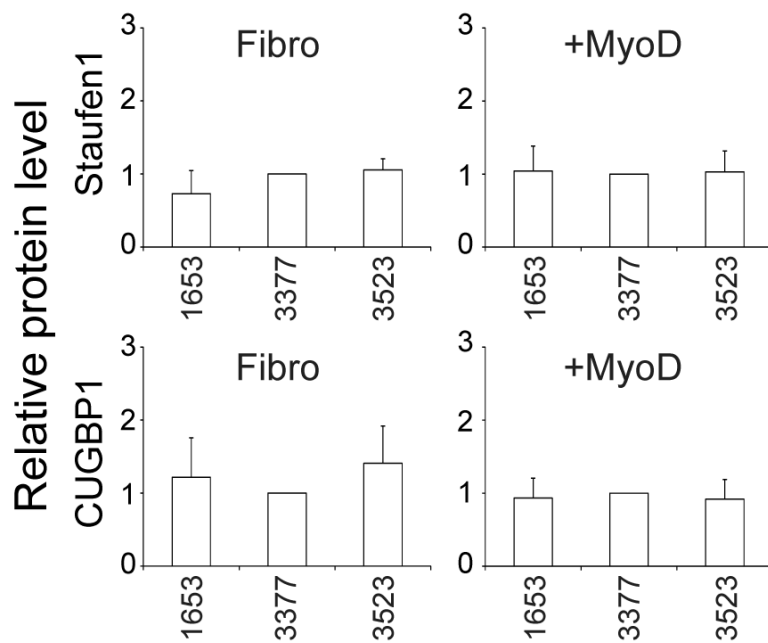

**Figure S7: No difference in Staufen1 and CUGBP1 levels in wild-type control fibroblasts and MyoD-converted cells.** Quantifications of Western blots from Figure 7D. n=3 to 4 independent experiments. T-tests revealed no significant difference between control cell lines.
